# Supplementary material
Source: PubMed Central journal article supplement (PMC4732207)
Supplement: 10.1074_M115.684514_jbc.M115.684514-2.pdf [file 10.1074_M115.684514_jbc.M115.684514-2.pdf]

Supplemental video S1.

A representative example of behavior of CTRL and CKO mice at P10. These mice are placed on a paper and allowed to move freely. The upper two animals were *Prmt1<sup>flx/flx</sup>* mice and the lower two pups were *Prmt1<sup>flx/flx</sup>; Nes-Cre* mice.
